# Supplementary material for: Development of Electron Paramagnetic Resonance Magnet System for In Vivo Tooth Dosimetry
Source: Hindawi journal article supplement (doi:10.1155/2022/7332324), 2022-05-27
Supplement: f1 [file 7332324.f1.docx]

**Supplementary Information**

To adjust the central magnetic field to the Zeeman magnetic field, the magnetic field generated by permanent magnets (PMs) was calculated. The central magnetic field is calculated from the sum of the magnetic fields from each PM. When each PM is magnetized in in its axial direction, the magnetic field of one PM is given by

where is the surface current density by magnetization, is an arbitrary point where the magnetic field is calculated, is a point on the surface of the PM (Fig. A).


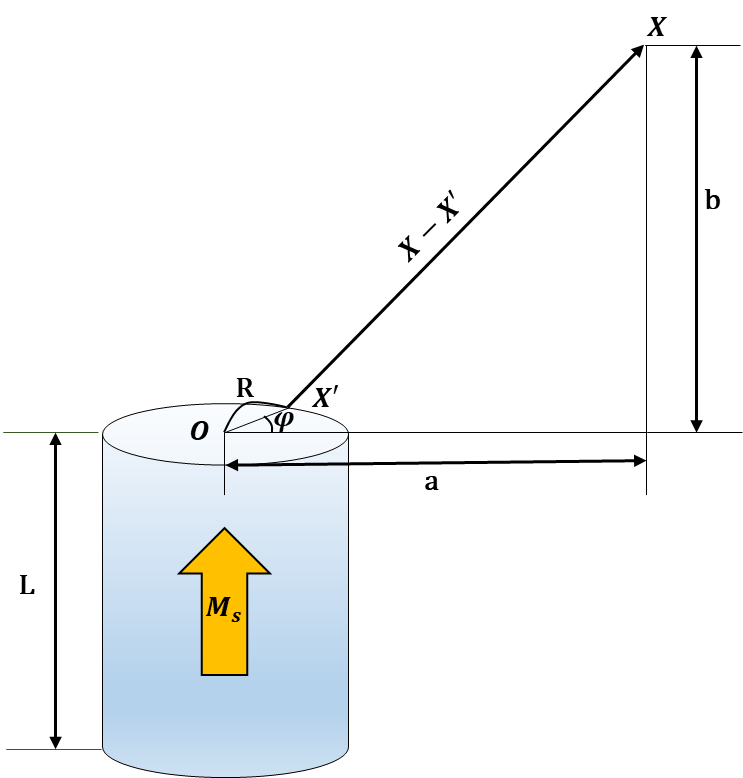


Fig. A

In this study, only the magnetic field in the axial axis is considered, which is

where is the incomplete elliptic integral of the first kind, and is the incomplete elliptic integral of the second kind:

In the magnet design of this study, a, b, R, and L were 7, 9.5, 1.25, and 6.2 cm, respectively. is the magnetization of PM, and is equal to the remnant flux density, . In the magnet system design, PM with nominal of 1.31 T was employed.
